# Supplementary material
Source: publisher figshare collection journal article supplement (https://gsajournals.figshare.com/ndownloader/files/23187044)
Supplement: Supplementary file 1 [file 23187044]

| **Sample Name** | **Sex** | **Collection Locality** | **Coordinates** | **SRA Accession Number** |
| --- | --- | --- | --- | --- |
| *Bembidion* sp. nr. *transversale* DNA3229 | Male | USA: Oregon: Corvallis | 44.5491 N 123.2451 W | SRR8801541 |
| *Bembidion lividulum* DNA4279 | Male | USA: California: Sonora Pass | 38.3322 N 119.6500 W | SRR8801544 |
| *Chlaenius sericeus* JMPR007 | Male | USA: California: Wilcox Ranch | 38.2497 N 121.8783 W | SRR8801540 |
| *Lionepha casta* DNA4602 | Male | USA: Oregon: Marys Peak | 44.4746 N 123.5286 W | SRR8801542 |
| *Pterostichus melanarius* DNA4765 | Male | USA: Oregon: Corvallis | 44.5488 N 123.2482 W | SRR8801543 |
| *Trachypachus gibbsii* DNA4436 | Male | USA: California: Carson Spur | 38.7047 N 120.1048 W | SRR8801545 |

Table S3. Information on transcriptomic specimens sequenced.
